# Supplementary material
Source: PubMed Central journal article supplement (PMC2687461)
Supplement: supp_136_8_1273__1.pdf [file supp_136_8_1273__1.pdf]

**Table S1. Quantitation values for pixel counts of Or22a>GFP terminals in normal and mutant genotypes as plotted in Fig. 2G**

|             | Or22a>GFP;<br>Or22a>GFP; 8 days PE | Or22a>GFP;<br>Or83b <sup>-</sup> /Or83b <sup>-</sup> ; 8 days PE | Or22a>GFP; Or83b <sup>-</sup> /Or83b <sup>-</sup><br>UAS Or83b ON at 2 days PE<br>tested at 8 days PE | Or22a>GFP; Or83b <sup>-</sup> /Or83b <sup>-</sup><br>UAS Or83b ON at 4 days PE<br>tested at 8 days PE | Or22a>GFP;<br>Or83b <sup>-</sup> /Or83b <sup>-</sup> UAS Or83b<br>ON at 6 days PE tested at<br>8 days PE |
|-------------|------------------------------------|------------------------------------------------------------------|-------------------------------------------------------------------------------------------------------|-------------------------------------------------------------------------------------------------------|----------------------------------------------------------------------------------------------------------|
| Pixel count | 40231.3±2890.3                     | 17891.2±3031.2                                                   | 35682.2±2312.1                                                                                        | 31570.9±2787.9                                                                                        | 15906.9±2901.2                                                                                           |

Pixel count values represent the mean±s.e.m., n=5 for each case.

**Table S2. Quantitation values for pixel counts on Or22a>GFP neurons in normal and mutant genotypes plotted in Fig. 2G**

|             | Or22a>GFP; 6 days PE | Or22a>GFP; Or83b <sup>-</sup> /Or83b <sup>-</sup> ;<br>6 days PE | Or22a>GFP/UAS Eag DN, UAS Sh<br>DN; Or83b <sup>-</sup> /Or83b <sup>-</sup> ; 6 days PE | Or22a>GFP/UAS Eag DN, UAS<br>Sh; 6 days PE |
|-------------|----------------------|------------------------------------------------------------------|----------------------------------------------------------------------------------------|--------------------------------------------|
| Pixel count | 45114.2±2200.5       | 22422.8±2111.2                                                   | 42679.8±2536.5                                                                         | 44789.12±3010.9                            |

Pixel count values represent the mean±s.e.m., n=5 for each case.

**Table S3. Quantitation values for pixel counts of Or22a>GFP neurons in normal and mutant genotypes as plotted in Fig. 5D**

|             | Or22a>GFP; 6 days PE | Or22a>GFP; Or83b <sup>-</sup> /Or83b <sup>-</sup> ;<br>6 days PE | Or22a>GFP/UAS Sgg DN.A81T;<br>Or83b <sup>-</sup> /Or83b <sup>-</sup> ; 6 days PE | Or22a>GFP; Or83b <sup>-</sup> /Or83b <sup>-</sup><br>fed 10 mM LiCl 6 days PE |
|-------------|----------------------|------------------------------------------------------------------|----------------------------------------------------------------------------------|-------------------------------------------------------------------------------|
| Pixel count | 45114.2±2200.5       | 22422.8±2111.2                                                   | 40281.2±2921.6                                                                   | 37819.1±3100.9                                                                |

Pixel count values represent the mean±s.e.m., n≥5 for each case.

**Table S4. Quantitation values for pixel counts of Or22a>GFP neurons in mutant and rescue genotypes**

|                                                                      | Mean±s.e.m.     | Bar chart plotted in figure |
|----------------------------------------------------------------------|-----------------|-----------------------------|
| Or22a>GFP; Or83b <sup>-</sup> /Or83b <sup>-</sup> at 6 days PE       | 25892.09±2908.6 | –                           |
| Or22a>GFP/UAS Dsh; Or83b <sup>-</sup> /Or83b <sup>-</sup> 6 days PE  | 35421.2±2309.2  | 5D                          |
| Or22a>GFP/UAS Wg; Or83b <sup>-</sup> /Or83b <sup>-</sup> 6 days PE   | 34021.2±2908.8  | 7F                          |
| Or22a>GFP/UAS UBP2; Or83b <sup>-</sup> /Or83b <sup>-</sup> 6 days PE | 37890.9±2907.2  | S6I                         |

n≥5 for each case.

**Table S5. Quantitation values for Wingless levels within the DM2 glomerulus as plotted in Fig. 7C**

|    | Control (n=5) | 5× high K <sup>+</sup> (n=6) |
|----|---------------|------------------------------|
| Wg | 1869.07±62.9  | 2277.8±72.2                  |

Values represent the mean±s.e.m.

**Table S6. Quantitation values for pixel counts of Or22a axons within the selected ROI in Fig. S2 as plotted in Fig. S2F**

|                                                                          |                |
|--------------------------------------------------------------------------|----------------|
| (A) Or22a>GFP; Or83b <sup>+</sup> /Or83b <sup>+</sup> at 6 days PE (n=5) | 24034.3±2345.7 |
| (B) Or22a>GFP; Or83b <sup>-</sup> /Or83b <sup>-</sup> at 2 days PE (n=6) | 22409.2±3098.2 |
| (C) Or22a>GFP; Or83b <sup>-</sup> /Or83b <sup>-</sup> at 4 days PE (n=5) | 21098.2±2345.4 |
| (D) Or22a>GFP; Or83b <sup>-</sup> /Or83b <sup>-</sup> at 6 days PE (n=6) | 11209.8±2909.8 |
| (E) Or22a>GFP; Or83b <sup>-</sup> /Or83b <sup>-</sup> at 8 days PE (n=6) | 10109.2±2908.9 |

Values represent the mean±s.e.m.

**Table S7. Quantitation values for pixel counts of Or22a>GFP axons for mutant and rescue genotypes as plotted in Fig. S3C**

|                                                                           |                 |
|---------------------------------------------------------------------------|-----------------|
| (A) Or22a>GFP>Or83b; Or83b <sup>-</sup> /Or83b <sup>-</sup> at 4 days PE  | 44509.2±3409.2  |
| (B) Or22a>GFP; Or83b <sup>-</sup> /Or83b <sup>-</sup> at 4 days PE        | 33670.9±2809.8  |
| (A') Or22a>GFP>Or83b; Or83b <sup>-</sup> /Or83b <sup>-</sup> at 6 days PE | 43409.2±3109.8  |
| (B') Or22a>GFP; Or83b <sup>-</sup> /Or83b <sup>-</sup> at 6 days PE       | 25621.3±3200.09 |

Values represent the mean±s.e.m., n≥5 for each case.

**Table S8. Quantitation values for Or47b>TNT, with Or47b>IMPTNT-V (control) and Or47b>TNT-G (experimental) for glomerular volume, GFP (as plotted in Fig. S4) and Draper levels (as plotted in Fig. S6)**

|                                      | VA6 IMPTNT-V | VA6 TNT-G                              | VA1v IMPTNT-V | VA1v TNT-G | VA1v IMPTNT-V<br>VA6 IMPTNT-V*      | VA1v TNT-G<br>VA1v TNT-G* |
|--------------------------------------|--------------|----------------------------------------|---------------|------------|-------------------------------------|---------------------------|
| Glomerular volume (μm <sup>3</sup> ) | 4019±45      | 4137±49                                | 10978±149     | 8142±181   | 2.73±0.06                           | 1.97±0.06                 |
| GFP                                  |              | VA1v IMPTNT-V <sup>†</sup><br>2747±17  |               |            | VA1v TNT-G <sup>†</sup><br>2784±15  |                           |
| Draper                               |              | VA1v IMPTNT-V <sup>†</sup><br>407.4±31 |               |            | VA1v TNT-G <sup>†</sup><br>788.1±31 |                           |

n=5 for C and E, except for Draper where n=7 for C and E.

Values represent the mean±s.e.m. C refers to number of control animals and E refers to number of experimental animals.

\*Glomerular volume of VA1v glomerulus normalized to volume of unaffected VA6 glomerulus of the same antennal lobe.

<sup>†</sup>Average intensity per pixel of remaining OSN terminals (judged by GFP staining) in VA1v glomerulus, compared in equivalent ROIs between experimental and control animals.

<sup>‡</sup>Average intensity per pixel of ROI, within VA1v glomerulus (white rectangle in Fig. S6K,M), compared between experimental and control antennal lobes.
